# Supplementary material for: YPED: An Integrated Bioinformatics Suite and Database for Mass Spectrometry-based Proteomics Research
Source: PubMed Central journal article supplement (PMC4411476; doi:10.1016/j.gpb.2014.11.002), 2015-02-21
Supplement: mmc3.pdf [file mmc3.pdf]

results (14).xls - Microsoft Excel

File Home Insert Page Layout Formulas Data Review View Developer

L7 fx

|    | A     | B           | C           | D                   | E     | F          | G             | H      | I               | J | K |
|----|-------|-------------|-------------|---------------------|-------|------------|---------------|--------|-----------------|---|---|
| 1  | Score | Expectation | Protein ID  | Protein Name        | MW    | % Coverage | Comment       | empai  | Prophet P value |   |   |
| 2  | 1339  | 0           | ARF1_HUMAN  | ADP-ribosylation    | 20684 | 60.8       |               | 20.36  | 1               |   |   |
| 3  | 1161  | 1.90E-112   | CALM_HUMAN  | Calmodulin OS=H     | 16827 | 52.3       |               | 202.74 | 1               |   |   |
| 4  | 947   | 5.00E-91    | ARF5_HUMAN  | ADP-ribosylation    | 20517 | 66.7       |               | 16.42  | 1               |   |   |
| 5  | 706   | 6.40E-67    | VISL1_HUMAN | Visinin-like prote  | 22128 | 56.5       |               | 13.33  | 1               |   |   |
| 6  | 690   | 2.90E-65    | COF1_HUMAN  | Cofilin-1 OS=Hom    | 18491 | 58.4       |               | 28.92  | 1               |   |   |
| 7  | 643   | 1.40E-60    | ARF4_HUMAN  | ADP-ribosylation    | 20498 | 46.7       |               | 4.8    | 1               |   |   |
| 8  | 547   | 5.30E-51    | MBP_HUMAN   | Myelin basic prot   | 33097 | 21.7       |               | 2.46   | 1               |   |   |
| 9  | 518   | 4.40E-48    | HPCA_HUMAN  | Neuron-specific c   | 22413 | 44.6       |               | 10.27  | 1               |   |   |
| 10 | 486   | 6.70E-45    | HPCL1_HUMAN | Hippocalcin-like p  | 22299 | 49.7       |               | 10.4   | 0.9842          |   |   |
| 11 | 480   | 3.00E-44    | NCALD_HUMAN | Neurocalcin-delta   | 22231 | 43         |               | 8.41   | 1               |   |   |
| 12 | 474   | 1.00E-43    | HPCL1_PONAB | Hippocalcin-like p  | 22211 | 42         | Tentative 1 s | 8.41   | 0.9946          |   |   |
| 13 | 393   | 1.20E-35    | COX2_MACMU  | Cytochrome c oxi    | 25474 | 22         |               | 3.17   | 1               |   |   |
| 14 | 295   | 8.20E-26    | ARPC3_HUMAN | Actin-related pro   | 20533 | 23.6       |               | 2.74   | 1               |   |   |
| 15 | 283   | 1.30E-24    | PEBP1_HUMAN | Phosphatidyletha    | 21044 | 35.3       |               | 1.92   | 1               |   |   |
| 16 | 279   | 3.20E-24    | DUS3_HUMAN  | Dual specificity pi | 20465 | 40.5       |               | 2.02   | 1               |   |   |
| 17 | 244   | 1.00E-20    | ML12A_HUMAN | Myosin regulator    | 19781 | 34.5       |               | 2.93   | 1               |   |   |
| 18 | 219   | 3.20E-18    | NDUS7_GORGO | NADH dehydroge      | 23471 | 26.3       |               | 1.17   | 1               |   |   |
| 19 | 205   | 8.70E-17    | SKP1_HUMAN  | S-phase kinase-as   | 18646 | 24.5       |               | 1.63   | 1               |   |   |
| 20 | 202   | 1.50E-16    | ARPC4_HUMAN | Actin-related pro   | 19654 | 28         |               | 2.15   | 1               |   |   |
| 21 | 199   | 3.10E-16    | PP1B_HUMAN  | Peptidyl-prolyl ci  | 23728 | 26.4       |               | 2.14   | 1               |   |   |
| 22 | 195   | 8.60E-16    | TBB3_HUMAN  | Tubulin beta-3 ch   | 50400 | 6.9        |               | 0.31   | 0.9996          |   |   |

results (14)

Ready 100%

Supplemental Figure 3.
