# Supplementary material for: YPED: An Integrated Bioinformatics Suite and Database for Mass Spectrometry-based Proteomics Research
Source: PubMed Central journal article supplement (PMC4411476; doi:10.1016/j.gpb.2014.11.002), 2015-02-21
Supplement: mmc4.pdf [file mmc4.pdf]

**TMTsixplex Results for Sample: TMTsixplex demo MASCOT SwissProt\_2013\_02.fasta**

| Execution Date       | Program Version | Database                                | Search Engine | Search Title      | Instrument |
|----------------------|-----------------|-----------------------------------------|---------------|-------------------|------------|
| 2013-02-15T18:32:38Z | 2.4.0           | SwissProt_2013_02.fasta tax:All entries | MASCOT        | HCD_Colangelo_TMT | Orbi       |

|                                                             |                                                |              |                             |
|-------------------------------------------------------------|------------------------------------------------|--------------|-----------------------------|
| <b>Protein Score Threshold</b>                              | 70                                             |              |                             |
|                                                             | <b>SwissProt_2013_02.fasta tax:All entries</b> | <b>Decoy</b> | <b>False discovery rate</b> |
| <b>Peptide matches above identity threshold</b>             | 334                                            | 6            | 1.8 %                       |
| <b>Peptide matches above homology or identity threshold</b> | 607                                            | 15           | 2.47 %                      |

**B**

[View TMTsixplex Sample Information](#)    
 [View Mascot Search Parameters](#)    
 [View Mascot Quantitation Parameters](#)    
 [View Peptide Summary](#)    
 [View Proteins with Indistinguishable](#)    
 [PantherSummary](#)

31 proteins identified.

| Score | Expectation | Protein ID                 | Protein Name                                                                                             | MW    | % Coverage           | Peptides             | Comment | 127/126 Ratio | 127/126 N | 127/126 SD | 127/126 Significance | 128/12 Ratio |
|-------|-------------|----------------------------|----------------------------------------------------------------------------------------------------------|-------|----------------------|----------------------|---------|---------------|-----------|------------|----------------------|--------------|
| 2060  | 0           | <a href="#">OVAL_CHICK</a> | Ovalbumin<br>OS=Gallus gallus<br>GN=SERPINB14<br>PE=1 SV=2                                               | 48008 | <a href="#">58.3</a> | <a href="#">view</a> |         | 0.912         | 81        | [1.156]    | ---                  | 0.866        |
| 1763  | 0           | <a href="#">ALBU_BOVIN</a> | Serum albumin<br>OS=Bos taurus<br>GN=ALB PE=1<br>SV=4                                                    | 85223 | <a href="#">50.9</a> | <a href="#">view</a> |         | 0.148         | 99        | 1.427      | *                    | 0.862        |
| 1439  | 0           | <a href="#">ADH1_YEAST</a> | Alcohol dehydrogenase 1<br>OS=Saccharomyces cerevisiae (strain ATCC 204508 / S288c) GN=ADH1<br>PE=1 SV=5 | 43011 | <a href="#">67</a>   | <a href="#">view</a> |         | 2.054         | 63        | [1.116]    | ---                  | 0.795        |
| 1302  | 3.4E-125    | <a href="#">CAH2_BOVIN</a> | Carbonic anhydrase 2<br>OS=Bos taurus<br>GN=CA2 PE=1<br>SV=3                                             | 33450 | <a href="#">66.5</a> | <a href="#">view</a> |         | 5.773         | 71        | 1.226      | *                    | 0.760        |

**Supplemental Figure 4.**
