# Supplementary material for: YPED: An Integrated Bioinformatics Suite and Database for Mass Spectrometry-based Proteomics Research
Source: PubMed Central journal article supplement (PMC4411476; doi:10.1016/j.gpb.2014.11.002), 2015-02-21
Supplement: mmc6.pdf [file mmc6.pdf]

A

## YPED Repository

### Menu for YPED Repository Searches

MS Instrument

Analysis

Protein ID

Protein Name (partial ok)

Peptide Sequence

Gene Symbols(one per line)

---

Search Repository   Projects [help](#)

Search Repository   Results [help](#)

For questions or comments contact [Mark Shifman](#)  
 Updated 10 Jun 2014 10:59

B

## YPED Repository

### Peptide Report LCMS

Search Term Protein ID KCC2G\_HUMAN

The top 3000 peptides are returned

51 peptides identified.

| Protein Name                                                                                          | Protein ID  | Peptide Score | Expectation | Sequence                                                    | Blast Results                 | Start | End | Delta   | ppm   | M/Z       | Charge | Mascot DAT               |
|-------------------------------------------------------------------------------------------------------|-------------|---------------|-------------|-------------------------------------------------------------|-------------------------------|-------|-----|---------|-------|-----------|--------|--------------------------|
| Calcium/calmodulin-dependent protein kinase type II subunit gamma OS=Homo sapiens GN=CAMK2G PE=1 SV=3 | KCC2G_HUMAN | 101           | 1.4E-8      | K.ICDPGLTSFEPEALGNLVEGMDFHK.F                               | <a href="#">BLAST Results</a> | 452   | 476 | -0.0274 | -9.9  | 926.0943  | 3      | <a href="#">download</a> |
| Calcium/calmodulin-dependent protein kinase type II subunit gamma OS=Homo sapiens GN=CAMK2G PE=1 SV=3 | KCC2G_HUMAN | 101           | 1.8E-8      | K.NLINQMQLTINPAK.R                                          | <a href="#">BLAST Results</a> | 247   | 259 | -0.0085 | -5.8  | 735.4066  | 2      | <a href="#">download</a> |
| Calcium/calmodulin-dependent protein kinase type II subunit gamma OS=Homo sapiens GN=CAMK2G PE=1 SV=3 | KCC2G_HUMAN | 101           | 1.8E-8      | K.NLINQMQLTINPAK.R                                          | <a href="#">BLAST Results</a> | 247   | 259 | -0.0085 | -5.8  | 735.4066  | 2      | <a href="#">download</a> |
| Calcium/calmodulin-dependent protein kinase type II subunit gamma OS=Homo sapiens GN=CAMK2G PE=1 SV=3 | KCC2G_HUMAN | 101           | 1.4E-8      | K.ICDPGLTSFEPEALGNLVEGMDFHK.F                               | <a href="#">BLAST Results</a> | 452   | 476 | -0.0274 | -9.9  | 926.0943  | 3      | <a href="#">download</a> |
| Calcium/calmodulin-dependent protein kinase type II subunit gamma OS=Homo sapiens GN=CAMK2G PE=1 SV=3 | KCC2G_HUMAN | 92            | 0.0000014   | R.LHDSISEEGFHYLVFDLVTGGELFEDIVAR.E                          | <a href="#">BLAST Results</a> | 76    | 105 | -0.0294 | -8.6  | 852.668   | 4      | <a href="#">download</a> |
| Calcium/calmodulin-dependent protein kinase type II subunit gamma OS=Homo sapiens GN=CAMK2G PE=1 SV=3 | KCC2G_HUMAN | 83            | 0.0000012   | R.FTDDYQLFEELGK.G                                           | <a href="#">BLAST Results</a> | 10    | 22  | 1.0036  | 625.4 | 803.3794  | 2      | <a href="#">download</a> |
| Calcium/calmodulin-dependent protein kinase type II subunit gamma OS=Homo sapiens GN=CAMK2G PE=1 SV=3 | KCC2G_HUMAN | 83            | 0.0000012   | R.FTDDYQLFEELGK.G                                           | <a href="#">BLAST Results</a> | 10    | 22  | 1.0036  | 625.4 | 803.3794  | 2      | <a href="#">download</a> |
| Calcium/calmodulin-dependent protein kinase type II subunit gamma OS=Homo sapiens GN=CAMK2G PE=1 SV=3 | KCC2G_HUMAN | 69            | 0.0000073   | K.AGAYDFPSPEWDTVTPKAK.N                                     | <a href="#">BLAST Results</a> | 228   | 246 | -0.0009 | -0.4  | 1040.9781 | 2      | <a href="#">download</a> |
| Calcium/calmodulin-dependent protein kinase type II subunit gamma OS=Homo sapiens GN=CAMK2G PE=1 SV=3 | KCC2G_HUMAN | 65            | 0.000024    | K.ICDPGLTSFEPEALGNLVEGMDFHK.F + Methyl (C-term); Methyl (K) | <a href="#">BLAST Results</a> | 452   | 476 | -0.0279 | -10   | 935.4379  | 3      | <a href="#">download</a> |

## Supplemental Figure 6.
